# Supplementary material for: Phosphoribosyl pyrophosphate synthetase activity affects growth and riboflavin production in Ashbya gossypii
Source: PubMed Central journal article supplement (PMC2551608; doi:10.1186/1472-6750-8-67), 2008-09-09
Supplement: 1472-6750-8-67-S1.pdf [file 1472-6750-8-67-S1.pdf]

## Additional file 1. Primers used in the study.

| <b>Purpose</b>    | <b>Primer name</b> | <b>Sequence<sup>a</sup></b>                       |
|-------------------|--------------------|---------------------------------------------------|
| <b>Cloning</b>    | 1295-A             | 5'-GCA AGG ACG GGG ACA AGT-3' (F)                 |
|                   | 1310-A             | 5'-TTC GCC AAT AAT CAA CTA-3' (R)                 |
|                   | 1311-A             | 5'-CCT GTC TGG ATG ATG TAG-3' (F)                 |
|                   | 5'1878             | 5'-GGA TTG TTA CCG GGG AAG GG-3' (F)              |
|                   | 3'1878             | 5'-CGT GGT GAA GTA TAT CAA GG-3' (R)              |
| <b>Expression</b> | AgPRS2,4-Nde       | 5'-GGA ATT CCA TAT GTC GTC CAA TAG CAT A-3' (F)   |
|                   | AgPRS2,4-Bam       | 5'-GGG ATC CTA CAT GAC AGC GTT ATT G-3' (R)       |
|                   | AgPRS3-Nde         | 5'-GGC ATA TGG CTA CTA ATG CAA TCA AG-3' (F)      |
|                   | AgPRS3-Bam         | 5'-CGG ATC CAA AAT CAT AGT GGG TTG-3' (R)         |
|                   | AgLEU2-Sal         | 5'-CCC CGT CGA CCA ACT GCC CCC AGC AGT ACC-3' (R) |
|                   | AgLEU2-Pme         | 5'-CCC CGT TTA AAC ACG CAT TCT TGC CTA GGC-3' (F) |
|                   | AgSPL1-Pme         | 5'-GGG GGT TTA AAC GGC TCC GCA GAC CAT CGC-3' (R) |
|                   | AgSPL1-Sal         | 5'-GGG GGT CGA CGT TGG CGT TAA ATA GGC AGT-3' (F) |
|                   | BKSP-a             | 5'-GAG GTT TAA ACC CAG CTT TTG TTC CCT TTA-3' (F) |
|                   | BKSP-b             | 5'-GGG TTT AAA CCT CCA ATT CGC CCT ATA GTG-3' (R) |
|                   | GPDt-Bam           | 5'-GGG GGA TCC GCC CGC TAA GCC GGG GGC TTG-3' (R) |
|                   | GPDt-Xho           | 5'-CCC CTC GAG TTT CCG GTA TGG CGA GCT GTG-3' (F) |
|                   | GPDp-Sal           | 5'-GGG GTC GAC GGT GTC TGG GTG CAC GAC AC-3' (F)  |
|                   | GPDp-Nde           | 5'-CCC ATA TGT GTG GAC TGA ATT AAT TCA AAC-3' (R) |
| <b>Mutations</b>  | PRS2,4L133Ia       | 5'-ATC ACG ATG GAT ATC CAC GCG TCT CAA-3' (F)     |
|                   | PRS2,4L133Ib       | 5'-TTG AGA CGC GTG GAT ATC CAT CGT GAT-3' (R)     |
|                   | PRS2,4H196Qa       | 5'-TTC GCG TTG ATC CAG AAA GAA CGG CAG-3' (F)     |
|                   | PRS2,4H196Qb       | 5'-CTG CCG TTC TTT CTG GAT CAA CGC GAA-3' (R)     |
|                   | PRS3L132I          | 5'-CCA TGG ACA TAC ACG CTT CG-3' (F)              |
|                   | PRS3H195Q          | 5'-GCG CTG ATT CAG AAG GAA CG-3' (F)              |

<sup>a</sup>Sequences of forward (F) and reverse (R) primers.
