# Supplementary material for: Phosphoribosyl pyrophosphate synthetase activity affects growth and riboflavin production in Ashbya gossypii
Source: BMC Biotechnol. 2008 Sep 9;8:67. doi: 10.1186/1472-6750-8-67 (PMC2551608; doi:10.1186/1472-6750-8-67)
Supplement: Additional file 2 — Alignments of PRS proteins. Underlined in red are the residues involved in ribose-5-phosphate binding; underlined in blue are the residues involved in pyrophosphate binding. Red circles indicate residues that have been described to participate in catalysis in the B. subtilis, E. coli and human PRPP synthetases. [file 1472-6750-8-67-S2.pdf]

alignment of Prs3 proteins

AGR371Cp **M**S S - - - - - **N**S I K L L A G N S H P D L A E K V **S**V R L G V P L S K **G**V Y **H**Y S N K E T S V T I G E S I R D E D V Y I I Q T G T **G**E Q E I N D F L M E L L I L M **I**H A C R 82  
 Sc\_Prs2 **M**S T - - - - - **N**S I K L L A G N S H **G**L A E L **S**V R L G V P L S K G V Y Q Y S N K E T S V T I G E S Y **G**E **H**E I N D F L M E L L I L I H A C K 82  
 Sc\_Prs4 **M**S E S R E D M A I **N**S K L L A G N S H P D L A E Q **T**S K **L**G **T**P L S K G V G V Y Q S N K E T S V T I G E S **L**R D E D V Y I I Q T G I **G**E Q E I N D F L M E L L I L I H A C Q 90

AGR371Cp **A**S A R K I T A V I P N F P Y A R Q D K K D K S R A P I T A K L V **A**K M L E T A G C N H V I T M D L H A S Q I G G F F H I P V D N L Y A E P N **T**L H Y I Q - H N V D F Q **N**S M L V 171  
 Sc\_Prs2 **T**A S **V**R R I T A V I P N F P Y A R Q D K K D K S R A P I T A K L **T**I A N L L E T A G C D H V I T M D L H A S Q I G G F F H I P V D N L Y G E P S V L N Y I R T - K T D F N 171  
 Sc\_Prs4 **T**A S A R K I T **T**V I P N F P Y A R Q D K K D K S R A P I T A K L V A N L **Q**T A G A D H V I T M D L H A S Q I G G F F H I P V D N L Y A E P S V L N Y I R A R K K T D F N A I L V 180

AGR371Cp **A**P D A G S A K R T S T **S**D K L N L N F A L I H K E R Q K A N E V S R M V L V G D V A D K S C **I**T I V D M D A D T C G T L V K A **T**D T L I E N G A K E V I A I V T H G I F S G G A R 261  
 Sc\_Prs2 **S**P D A G G A K R V A **S**A D K L D M N F A L I H K E R Q K A N E V S R M V L V G D V A G K S C L **L**T D M D A D T C G T L V K A C D T L M D H G A K E V I A I V T H G I F S G S A R 261  
 Sc\_Prs4 **S**P D A G G A K R V A **S**A D K L D L N F A L I H K E R Q K A N E V S **K**M V L V G D V T N K S C L L V D M A D T C G T L V K A C D T L M E H G A K E V I A I V T H G I F S G S A R 270

AGR371Cp **E**K L R N S K L A R I V S T N T V P V D L N L D I Y H Q I D I S A I L A E A I R R L H N G E S V S Y L F N N A V M 318  
 Sc\_Prs2 **E**K L **T**I N S R L S R I V C N T V P V D L D L I D V D I S P T I A E A I R R L H N G E S V S Y L F T H A P 318  
 Sc\_Prs4 **E**K L R N S R I V C N T V P V D L D L P I A D I D I S P T I A E A I R R L H N G E S V S Y L F T H A P V 327
